# Supplementary material for: The Effects of Prolonged Water-Only Fasting and Refeeding on Markers of Cardiometabolic Risk
Source: MDPI journal article supplement (doi:10.3390/nu14061183), 2022-03-11
Supplement: s1 [file s1]

**Table S1.** Baseline characteristics comparing subjects who completed protocol versus those who did not complete protocol.

|                                           | Completed Study |         | Did not complete study |         |
|-------------------------------------------|-----------------|---------|------------------------|---------|
|                                           | Male            | Female  | Male                   | Female  |
| Biological sex                            |                 |         |                        |         |
| N=                                        | 6               | 20      | 6                      | 16      |
| Age, years, mean (SD)                     | 57(10)          | 58(8)   | 51(7)                  | 58(9)   |
| BMI, kg/m <sup>2</sup> , mean (SD)        | 30 (3)          | 30 (6)  | 31(4)                  | 33(7)   |
| Abdominal circumference, mean, cm (SD)    | 104(8)          | 93(12)  | 109(10)                | 99(15)  |
| Systolic Blood pressure, mean, mmHg (SD)  | 128(16)         | 124(19) | 125(10)                | 126(21) |
| Diastolic Blood pressure, mean, mmHg (SD) | 84 (8)          | 79 (8)  | 83 (6)                 | 77 (6)  |
| Past Medical History                      |                 |         |                        |         |
| Asthma                                    | 0               | 2       | 0                      | 1       |
| Anxiety                                   | 0               | 4       | 3                      | 1       |
| Coronary Artery Disease                   | 0               | 0       | 1                      | 1       |
| Impaired Glucose                          | 2               | 1       | 0                      | 1       |
| Hyperlipidemia                            | 4               | 8       | 5                      | 4       |
| Hypertension                              | 2               | 7       | 2                      | 3       |
| Migraine                                  | 0               | 1       | 0                      | 0       |
| Obesity                                   | 3               | 12      | 5                      | 5       |
| Sleep Apnea                               | 0               | 1       | 0                      | 1       |
| Osteoarthritis                            | 1               | 3       | 0                      | 1       |

**Table S2.** Repeated Measures ANOVA, a sensitivity analysis for the Friedman test.

|                                    | Mean (SD)    |             |              | RMA<br><i>P</i> value | Mean Difference (Pooled SD)<br><i>Bonferroni Corrected P value</i> |                        |                                  |
|------------------------------------|--------------|-------------|--------------|-----------------------|--------------------------------------------------------------------|------------------------|----------------------------------|
|                                    | Baseline     | EOF         | EOR          |                       | EOF – Baseline                                                     | EOR – Baseline         | EOR - EOF                        |
| <b>Weight, kg</b>                  | 88.9 (17.1)  | 80.1 (16.4) | 81.7 (16.5)  | <0.0001               | -8.8 (16.8)<br><0.0001                                             | -7.3 (16.8)<br><0.0001 | 1.6 (16.5)<br>0.004              |
| <b>BMI, kg/m2</b>                  | 31.9 (5.4)   | 28.8 (5.2)  | 29.3 (5.1)   | <0.0001               | -3.2 (5.3)<br><0.0001                                              | -2.6 (5.2)<br><0.0001  | 0.5 (5.1)<br>0.0017              |
| <b>Abdominal circumference, cm</b> | 99.4 (11.2)  | 91.3 (11.4) | 92.9 (10.9)  | <0.0001               | -8.1 (11.3)<br><0.0001                                             | -6.5 (11.1)<br><0.0001 | 1.6 (11.2)<br>0.076 <sup>λ</sup> |
| <b>Systolic BP, mmHg</b>           | 134.6 (22.9) | 117.9 (9.9) | 116.8 (12.6) | 0.0003                | -16.7 (17.6)<br>0.0026                                             | -17.8 (18.5)<br>0.0017 | -1.2 (11.3)<br>1                 |

|                                 |              |              |              |                     |                                    |                         |                                     |
|---------------------------------|--------------|--------------|--------------|---------------------|------------------------------------|-------------------------|-------------------------------------|
| <b>Diastolic BP, mmHg</b>       | 81.2 (8.8)   | 79.5 (8.5)   | 77.5 (7.9)   | 0.1280 <sup>λ</sup> | -                                  | -                       | -                                   |
| <b>Total cholesterol, mg/dl</b> | 210.0 (39.1) | 208.2 (50.1) | 187.6 (29.4) | 0.0030              | -1.8 (44.9)<br>1                   | -22.4 (34.6)<br>0.0011  | -20.5 (41.1)<br>0.0288 <sup>λ</sup> |
| <b>HDL, mg/dL</b>               | 49.3 (12.6)  | 43.6 (9.3)   | 44.2 (8.8)   | 0.0040              | -5.7 (11.1)<br>0.0300 <sup>λ</sup> | -5.1 (10.9)<br>0.0130   | 0.6 (9.0)<br>1                      |
| <b>LDL, mg/dL</b>               | 135.0 (34.8) | 139.0 (49.6) | 108.2 (28.5) | <0.0001             | 4.0 (42.8)<br>1                    | -26.9 (31.8)<br><0.0001 | -30.8 (40.5)<br>0.0004              |
| <b>LDL &gt; 120mg/dL ‡</b>      | 157.8 (18.9) | 162.9 (42.0) | 123.2 (21.4) | 0.0008              | 5.1 (32.5)<br>1                    | -34.6 (20.2)<br><0.0001 | -39.8 (33.3)<br>0.0013              |
| <b>VLDL, mg/dL</b>              | 25.7 (10.3)  | 25.5 (4.5)   | 35.3 (8.6)   | <0.0001             | -0.1 (8.0)<br>1                    | 9.6 (9.5)<br>0.0011     | 9.7 (6.9)<br><0.0001                |
| <b>Triglycerides, mg/dL</b>     | 128.2 (51.5) | 127.3 (22.6) | 176.8 (43.1) | <0.0001             | -0.8 (39.7)<br>1                   | 48.7 (47.5)<br>0.0010   | 49.5 (34.4)<br><0.0001              |
| <b>hsCRP, mg/L</b>              | 3.97 (4.36)  | 4.56 (3.41)  | 2.38 (1.87)  | 0.0040              | 0.59 (3.91)<br>1                   | -1.59 (3.36)<br>0.0793  | -2.18 (2.75)<br>0.0028              |
| <b>hsCRP &gt; 2mg/dL ‡‡</b>     | 5.69 (4.53)  | 6.15 (3.07)  | 2.81 (1.80)  | 0.0010              | 0.45 (3.87)<br>1                   | -2.89 (3.45)<br>0.0103  | -3.34 (2.51)<br>0.0008              |
| <b>Glucose, nmol/L</b>          | 4.95 (0.57)  | 4.21 (0.62)  | 5.66 (0.93)  | <0.0001             | -0.74 (0.60)<br><0.0001            | 0.71 (0.77)<br><0.0001  | 1.45 (0.79)<br><0.0001              |
| <b>Insulin</b>                  | 8.1 (4.3)    | 6.3 (4.1)    | 17.1 (11.4)  | <0.0001             | -1.8 (4.2)<br>0.3031               | 9.0 (8.6)<br><0.0001    | 10.8 (8.5)<br>0.0002                |
| <b>HOMA-IR</b>                  | 0.43 (0.58)  | -0.03 (0.76) | 1.28 (0.65)  | <0.0001             | -0.47 (0.68)<br>0.0095             | 0.85 (0.61)<br><0.0001  | 1.32 (0.71)<br><0.0001              |

*N* = 26. Omnibus p-values are from RMA; post-hoc p-values are from paired t-tests with a Bonferroni correction. SD, standard deviation; EOF, end-of-fast; EOR, end-of-refeed; kg, kilogram; m, meter; cm, centimeter; BP, blood pressure; mmHg, millimeter mercury; mg, milligram; dL, deciliter; HDL, high-density lipoprotein; LDL, low-density lipoprotein; VLDL, very-low-density lipoprotein; hsCRP, high-sensitivity C-reactive protein; HOMA-IR, homeostatic model assessment for insulin resistance; HOMA-IR was log transformed prior to modeling. ‡ *N* = 16. ‡‡ *N* = 17. ζ = Direction of a statistically significant coefficient diverges from a statistically significant coefficient from the main model of interest. λ = Statistical significance of p-value diverges from the main model of interest.

**Table S3.** Change Score Regression (no outliers), a sensitivity analysis for Siegel repeated medians

| Model                                    |                                     | Sample Size | R <sup>2</sup> | Coefficients |      | t value | Pr(> t ) |
|------------------------------------------|-------------------------------------|-------------|----------------|--------------|------|---------|----------|
| Change Score                             | Dependent Variable                  |             |                | $\beta$      | S.E. |         |          |
| Abdominal Circumference, cm <sup>‡</sup> | Length of Fast, days                | 25          | 0.52           | -0.41        | 0.08 | -4.95   | <0.0001  |
| Abdominal Circumference, cm              | Length of Refeed, days              | 25          | 0.19           | -0.31        | 0.13 | -2.35   | 0.0276   |
| Abdominal Circumference, cm              | Length of Total, days               | 25          | 0.51           | -0.27        | 0.06 | -4.93   | <0.0001  |
| LDL, mg/dL                               | Length of Fast, days                | 26          | 0.01           | -0.51        | 0.94 | -0.55   | 0.5902   |
| LDL, mg/dL                               | Length of Refeed, days <sup>^</sup> | 26          | 0.01           | 0.49         | 1.16 | 0.42    | 0.68     |
| LDL, mg/dL                               | Length of Total, days               | 26          | 0.00           | -0.09        | 0.63 | -0.14   | 0.894    |
| hsCRP, mg/L <sup>‡</sup>                 | Length of Fast, days                | 25          | 0.18           | -0.22        | 0.10 | -2.24   | 0.0352   |
| hsCRP, mg/L <sup>‡</sup>                 | Length of Refeed, days <sup>^</sup> | 25          | 0.10           | -0.21        | 0.13 | -1.61   | 0.1204   |
| hsCRP, mg/L                              | Length of Total, days               | 25          | 0.21           | -0.16        | 0.07 | -2.45   | 0.0224   |
| Weight, kg                               | Length of Fast, days                | 26          | 0.29           | -0.32        | 0.10 | -3.14   | 0.0045   |
| Weight, kg                               | Length of Refeed, days              | 25          | 0.37           | -0.37        | 0.10 | -3.65   | 0.0013   |
| Weight, kg                               | Length of Total, days               | 25          | 0.52           | -0.24        | 0.05 | -4.98   | <0.0001  |
| BMI, kg/m2 <sup>‡</sup>                  | Length of Fast, days                | 25          | 0.52           | -0.13        | 0.03 | -5.01   | <0.0001  |
| BMI, kg/m2                               | Length of Refeed, days              | 25          | 0.39           | -0.14        | 0.04 | -3.86   | 0.0008   |
| BMI, kg/m2                               | Length of Total, days               | 25          | 0.68           | -0.10        | 0.01 | -6.97   | <0.0001  |
| Systolic BP, mmHg                        | Length of Fast, days                | 26          | 0.02           | 0.59         | 0.89 | 0.66    | 0.5132   |
| Systolic BP, mmHg                        | Length of Refeed, days              | 26          | 0.00           | -0.12        | 1.11 | -0.11   | 0.9161   |
| Systolic BP, mmHg                        | Length of Total, days               | 26          | 0.01           | 0.23         | 0.60 | 0.38    | 0.705    |
| Diastolic BP, mmHg <sup>‡</sup>          | Length of Fast, days <sup>^</sup>   | 25          | 0.11           | 0.51         | 0.31 | 1.65    | 0.1124   |
| Diastolic BP, mmHg                       | Length of Refeed, days              | 26          | 0.02           | -0.31        | 0.49 | -0.63   | 0.533    |
| Diastolic BP, mmHg                       | Length of Total, days               | 26          | 0.09           | 0.08         | 0.26 | 0.31    | 0.761    |
| Total Cholesterol, mg/dL                 | $\Delta$ LDL, mg/dL                 | 26          | 0.74           | 0.98         | 0.12 | 8.29    | <0.0001  |
| Total Cholesterol, mg/dL                 | $\Delta$ HDL, mg/dL <sup>^</sup>    | 26          | 0.07           | 0.87         | 0.66 | 1.33    | 0.1973   |
| Total Cholesterol, mg/dL                 | $\Delta$ VLDL, mg/dL <sup>^</sup>   | 26          | 0.15           | 0.89         | 0.44 | 2.04    | 0.0525   |
| Total Cholesterol, mg/dL                 | $\Delta$ Triglycerides, mg/dL       | 26          | 0.15           | 0.18         | 0.09 | 2.08    | 0.0481   |
| Total Cholesterol, mg/dL                 | Length of Fast, days                | 26          | 0.00           | -0.13        | 1.08 | -0.12   | 0.906    |
| Total Cholesterol, mg/dL                 | Length of Refeed, days <sup>^</sup> | 26          | 0.02           | 0.92         | 1.32 | 0.70    | 0.4905   |
| Total Cholesterol, mg/dL                 | Length of Total, days               | 26          | 0.00           | 0.21         | 0.72 | 0.30    | 0.77     |
| Triglycerides, mg/dL                     | Length of Fast, days <sup>^</sup>   | 26          | 0.10           | 3.63         | 2.21 | 1.64    | 0.1133   |
| Triglycerides, mg/dL                     | Length of Refeed, days <sup>^</sup> | 26          | 0.06           | 3.40         | 2.79 | 1.22    | 0.235    |
| Triglycerides, mg/dL                     | Length of Total, days <sup>^</sup>  | 26          | 0.12           | 2.62         | 1.46 | 1.79    | 0.0861   |
| HDL, mg/dL                               | Length of Fast, days <sup>^</sup>   | 26          | 0.04           | -0.32        | 0.32 | -1.01   | 0.3215   |
| HDL, mg/dL                               | Length of Refeed, days              | 26          | 0.01           | -0.22        | 0.40 | -0.55   | 0.591    |
| HDL, mg/dL                               | Length of Total, days <sup>^</sup>  | 26          | 0.04           | -0.21        | 0.21 | -0.97   | 0.34     |
| VLDL, mg/dL                              | Length of Fast, days <sup>^</sup>   | 26          | 0.02           | 0.02         | 0.03 | 0.62    | 0.54     |
| VLDL, mg/dL                              | Length of Refeed, days <sup>^</sup> | 26          | 0.05           | 0.65         | 0.56 | 1.16    | 0.257    |
| VLDL, mg/dL                              | Length of Total, days <sup>^</sup>  | 26          | 0.11           | 0.50         | 0.29 | 1.72    | 0.0976   |
| Glucose, nmol/L                          | Length of Fast, days                | 26          | 0.02           | 0.28         | 0.45 | 0.62    | 0.54     |
| Glucose, nmol/L                          | Length of Refeed, days              | 26          | 0.06           | -0.04        | 0.03 | -1.26   | 0.2212   |
| Glucose, nmol/L                          | Length of Total, days               | 26          | 0.66           | 0.00         | 0.02 | -0.25   | 0.807    |
| Insulin <sup>‡</sup>                     | Length of Fast, days                | 25          | 0.00           | -0.02        | 0.25 | -0.09   | 0.9288   |

|                      |                                        |    |      |       |      |       |        |
|----------------------|----------------------------------------|----|------|-------|------|-------|--------|
| Insulin              | Length of Refeed, days                 | 25 | 0.02 | 0.18  | 0.27 | 0.65  | 0.523  |
| Insulin              | Length of Total, days                  | 25 | 0    | 0.05  | 0.16 | 0.33  | 0.747  |
| HOMA-IR              | Length of Fast, days                   | 26 | 0.06 | 0.02  | 0.02 | 1.28  | 0.214  |
| HOMA-IR              | Length of Refeeding, days <sup>λ</sup> | 26 | 0.01 | -0.01 | 0.02 | -0.39 | 0.703  |
| HOMA-IR              | Length of Total, days                  | 26 | 0.44 | 0.01  | 0.01 | 0.62  | 0.54   |
| HOMA-IR <sup>α</sup> | Length of Fast, days                   | 26 | 0.03 | 0.02  | 0.03 | 0.79  | 0.44   |
| HOMA-IR <sup>α</sup> | Length of Refeeding, days              | 26 | 0.01 | -0.02 | 0.04 | -0.47 | 0.6453 |
| HOMA-IR <sup>α</sup> | Length of Total, days                  | 26 | 0    | 0.01  | 0.02 | 0.27  | 0.791  |

$N = 26$ . ‡ = 25 observations (i.e.,  $N = 25$ ). Change scores are from baseline to EOR.  $\alpha$  = Change score from baseline to EOF.  $\lambda$  = Statistical significance of p-value diverges from the main model of interest.

**Table S4.** Change Score Regression (with outliers), a sensitivity analysis for Siegel repeated medians

| Model                       |                                        | R <sup>2</sup> | Coefficients |      | t value | Pr(> t ) |
|-----------------------------|----------------------------------------|----------------|--------------|------|---------|----------|
| Change Score                | Baseline                               |                | $\beta$      | S.E. |         |          |
| Abdominal Circumference, cm | Length of Fast, days                   | 0.36           | -0.45        | 0.12 | -3.65   | 0.0013   |
| Abdominal Circumference, cm | Length of Refeed, days <sup>λ</sup>    | 0.10           | -0.29        | 0.18 | -1.62   | 0.1179   |
| Abdominal Circumference, cm | Length of Total, days                  | 0.32           | -0.29        | 0.09 | -3.39   | 0.0024   |
| hsCRP, mg/L                 | Length of Fast, days <sup>λ</sup>      | 0.14           | -0.24        | 0.12 | -1.94   | 0.0647   |
| hsCRP, mg/L                 | Length of Refeeding, days <sup>λ</sup> | 0.06           | -0.19        | 0.16 | -1.2    | 0.2404   |
| hsCRP, mg/L                 | Length of Total, days <sup>λ</sup>     | 0.14           | -0.16        | 0.08 | -1.98   | 0.0593   |
| Weight, kg                  | Length of Refeed, days                 | 0.29           | -0.40        | 0.13 | -3.14   | 0.0045   |
| Weight, kg                  | Length of Total, days                  | 0.43           | -0.26        | 0.06 | -4.21   | 0.0003   |
| BMI, kg/m <sup>2</sup>      | Length of Fast, days                   | 0.43           | -0.14        | 0.03 | -4.28   | 0.0003   |
| BMI, kg/m <sup>2</sup>      | Length of Refeed, days                 | 0.32           | -0.15        | 0.05 | -3.34   | 0.0027   |
| BMI, kg/m <sup>2</sup>      | Length of Total, days                  | 0.55           | -0.11        | 0.02 | -5.47   | <0.0001  |
| Diastolic BP, mmHg          | Length of Fast, days <sup>λ</sup>      | 0.04           | 0.38         | 0.39 | 0.99    | 0.3329   |
| Insulin                     | Length of Fast, days <sup>λ</sup>      | 0.16           | 0.70         | 0.32 | 2.17    | 0.0404   |
| Insulin                     | Length of Refeed, days                 | 0.06           | 0.53         | 0.42 | 1.27    | 0.218    |
| Insulin                     | Length of Total, days <sup>λ</sup>     | 0.16           | 0.47         | 0.21 | 2.17    | 0.0398   |

$N = 26$ . Change scores are from baseline to EOR.  $\lambda$  = Statistical significance of p-value diverges from the main model of interest.

**Table S5.** Baseline Adjusted Regression (no outliers), a sensitivity analysis for Siegel repeated medians.

| Model                                    |                             | Sample Size | R <sup>2</sup> | Coefficients |      | t value | Pr(> t ) |
|------------------------------------------|-----------------------------|-------------|----------------|--------------|------|---------|----------|
| Dependent Variable                       | Baseline                    |             |                | $\beta$      | S.E. |         |          |
| Abdominal Circumference, cm <sup>‡</sup> | Abdominal Circumference, cm | 25          | 0.97           | 0.94         | 0.04 | 25.07   | <0.0001  |
|                                          | Length of Fast, days        |             |                | -0.40        | 0.08 | -5.03   | <0.0001  |

|                             |                                        |    |      |       |      |       |         |
|-----------------------------|----------------------------------------|----|------|-------|------|-------|---------|
| Abdominal Circumference, cm | Abdominal Circumference, cm            | 25 | 0.94 | 0.96  | 0.05 | 18.22 | <0.0001 |
|                             | Length of Refeed, days <sup>λ</sup>    |    |      | -0.28 | 0.14 | -2.01 | 0.0574  |
| Abdominal Circumference, cm | Abdominal Circumference, cm            | 25 | 0.96 | 0.96  | 0.04 | 24.27 | <0.0001 |
|                             | Length of Total, days                  |    |      | -0.26 | 0.06 | -4.64 | 0.0001  |
| LDL, mg/dL                  | LDL, mg/dL                             | 26 | 0.52 | 0.59  | 0.12 | 4.87  | <0.0001 |
|                             | Length of Fast, days                   |    |      | 0.07  | 0.80 | 0.09  | 0.933   |
| LDL, mg/dL                  | LDL, mg/dL                             | 26 | 0.55 | 0.56  | 0.12 | 4.84  | <0.0001 |
| LDL, mg/dL                  | LDL, mg/dL                             | 26 | 0.53 | 0.57  | 0.12 | 4.73  | <0.0001 |
|                             | Length of Total, days                  |    |      | 0.38  | 0.53 | 0.71  | 0.485   |
| hsCRP, mg/L‡                | hsCRP, mg/L                            | 25 | 0.33 | 0.32  | 0.10 | 3.19  | 0.0042  |
|                             | Length of Fast, days <sup>λ</sup>      |    |      | -0.04 | 0.06 | -0.64 | 0.5306  |
| hsCRP, mg/L‡                | hsCRP, mg/L                            | 25 | 0.33 | 0.31  | 0.09 | 3.23  | 0.0038  |
|                             | Length of Refeeding, days <sup>λ</sup> |    |      | -0.04 | 0.07 | -0.56 | 0.5812  |
| hsCRP, mg/L                 | hsCRP, mg/L                            | 25 | 0.33 | 0.32  | 0.10 | 3.23  | 0.0038  |
|                             | Length of Total, days <sup>λ</sup>     |    |      | -0.03 | 0.04 | -0.76 | 0.4573  |
| Weight, kg                  | Weight, kg                             | 26 | 0.98 | 0.92  | 0.03 | 31.92 | <0.0001 |
|                             | Length of Fast, days                   |    |      | -0.38 | 0.09 | -4.04 | 0.0005  |
| Weight, kg                  | Weight, kg                             | 25 | 0.99 | 0.95  | 0.03 | 37.93 | <0.0001 |
|                             | Length of Refeed, days                 |    |      | -0.32 | 0.10 | -3.18 | 0.0044  |
| Weight, kg                  | Weight, kg                             | 25 | 0.99 | 0.93  | 0.02 | 53.37 | <0.0001 |
|                             | Length of Total, days                  |    |      | -0.24 | 0.04 | -6.28 | <0.0001 |
| BMI, kg/m2                  | BMI, kg/m2                             | 25 | 0.99 | 0.93  | 0.02 | 43.98 | <0.0001 |
|                             | Length of Fast, days                   |    |      | -0.13 | 0.02 | -6.01 | <0.0001 |
| BMI, kg/m2                  | BMI, kg/m2                             | 25 | 0.98 | 0.96  | 0.03 | 31.58 | <0.0001 |
|                             | Length of Refeed, days                 |    |      | -0.12 | 0.03 | -3.19 | 0.0043  |
| BMI, kg/m2                  | BMI, kg/m2                             | 25 | 0.99 | 0.95  | 0.02 | 48.74 | <0.0001 |
|                             | Length of Total, days                  |    |      | -0.09 | 0.01 | -6.97 | <0.0001 |
| Systolic BP, mmHg           | Systolic BP, mmHg                      | 26 | 0.07 | 0.14  | 0.11 | 1.24  | 0.229   |

|                          |                                     |    |      |       |      |       |         |
|--------------------------|-------------------------------------|----|------|-------|------|-------|---------|
|                          | Length of Fast, days                |    |      | -0.11 | 0.49 | -0.22 | 0.831   |
| Systolic BP, mmHg        | Systolic BP, mmHg                   | 26 | 0.07 | 0.14  | 0.11 | 1.29  | 0.211   |
|                          | Length of Refeed, days              |    |      | 0.12  | 0.60 | 0.20  | 0.85    |
| Systolic BP, mmHg        | Systolic BP, mmHg                   | 26 | 0.07 | 0.14  | 0.11 | 1.29  | 0.211   |
|                          | Length of Total, days               |    |      | -0.01 | 0.32 | -0.04 | 0.972   |
| Diastolic BP, mmHg       | Diastolic BP, mmHg                  | 25 | 0.21 | 0.39  | 0.16 | 2.42  | 0.024   |
|                          | Length of Fast, days <sup>^</sup>   |    |      | 0.15  | 0.26 | 0.58  | 0.568   |
| Diastolic BP, mmHg       | Diastolic BP, mmHg                  | 26 | 0.12 | 0.22  | 0.18 | 1.23  | 0.2316  |
|                          | Length of Refeed, days              |    |      | -0.44 | 0.37 | -1.19 | 0.2459  |
| Diastolic BP, mmHg       | Diastolic BP, mmHg                  | 26 | 0.09 | 0.20  | 0.19 | 1.07  | 0.295   |
|                          | Length of Total, days               |    |      | -0.15 | 0.21 | -0.72 | 0.4776  |
| Total Cholesterol, mg/dL | Total Cholesterol, mg/dL            | 26 | 0.82 | 0.80  | 0.08 | 10.14 | <0.0001 |
|                          | $\Delta$ LDL, mg/dL                 |    |      | 0.81  | 0.13 | 6.35  | <0.0001 |
| Total Cholesterol, mg/dL | Total Cholesterol, mg/dL            | 26 | 0.53 | 0.55  | 0.11 | 5.04  | <0.0001 |
|                          | $\Delta$ HDL, mg/dL <sup>^</sup>    |    |      | 0.57  | 0.51 | 1.11  | 0.2806  |
| Total Cholesterol, mg/dL | Total Cholesterol, mg/dL            | 26 | 0.53 | 0.58  | 0.11 | 5.04  | <0.0001 |
|                          | $\Delta$ VLDL, mg/dL <sup>^</sup>   |    |      | 0.43  | 0.37 | 1.14  | 0.27    |
| Total Cholesterol, mg/dL | Total Cholesterol, mg/dL            | 26 | 0.51 | 0.52  | 0.11 | 4.62  | 0.0001  |
|                          | Length of Fast, days                |    |      | 0.58  | 0.83 | 0.70  | 0.4909  |
| Total Cholesterol, mg/dL | Total Cholesterol, mg/dL            | 26 | 0.55 | 0.51  | 0.11 | 4.81  | <0.0001 |
|                          | Length of Refeed, days <sup>^</sup> |    |      | 1.49  | 0.98 | 1.53  | 0.1404  |
| Total Cholesterol, mg/dL | Total Cholesterol, mg/dL            | 26 | 0.54 | 0.50  | 0.11 | 4.62  | 0.0001  |

|                                |                                        |    |      |       |      |       |         |
|--------------------------------|----------------------------------------|----|------|-------|------|-------|---------|
|                                | Length of Total,<br>days               |    |      | 0.71  | 0.54 | 1.31  | 0.2043  |
| Total<br>Cholesterol,<br>mg/dL | Total<br>Cholesterol,<br>mg/dL         | 26 | 0.53 | 0.58  | 0.11 | 5.07  | <0.0001 |
|                                | ΔTriglycerides,<br>mg/dL <sup>λ</sup>  |    |      | 0.09  | 0.07 | 1.20  | 0.2422  |
| Triglycerides,<br>mg/dL        | Triglycerides,<br>mg/dL                | 26 | 0.15 | 0.21  | 0.16 | 1.30  | 0.2075  |
|                                | Length of Fast,<br>days <sup>λ</sup>   |    |      | 2.63  | 1.60 | 1.65  | 0.1134  |
| Triglycerides,<br>mg/dL        | Triglycerides,<br>mg/dL                | 26 | 0.09 | 0.20  | 0.17 | 1.19  | 0.2474  |
|                                | Length of<br>Refeed, days <sup>λ</sup> |    |      | 2.10  | 2.04 | 1.03  | 0.3153  |
| Triglycerides,<br>mg/dL        | Triglycerides,<br>mg/dL                | 26 | 0.15 | 0.22  | 0.16 | 1.35  | 0.19    |
|                                | Length of Total,<br>days <sup>λ</sup>  |    |      | 1.80  | 1.07 | 1.69  | 0.1055  |
| HDL, mg/dL                     | HDL, mg/dL                             | 26 | 0.58 | 0.53  | 0.09 | 5.66  | <0.0001 |
|                                | Length of Fast,<br>days <sup>λ</sup>   |    |      | -0.18 | 0.23 | -0.80 | 0.4337  |
| HDL, mg/dL                     | HDL, mg/dL                             | 26 | 0.58 | 0.52  | 0.09 | 5.60  | <0.0001 |
|                                | Length of<br>Refeed, days              |    |      | -0.24 | 0.28 | -0.86 | 0.3992  |
| HDL, mg/dL                     | HDL, mg/dL                             | 26 | 0.59 | 0.53  | 0.09 | 5.71  | <0.0001 |
|                                | Length of Total,<br>days <sup>λ</sup>  |    |      | -0.15 | 0.15 | -1.00 | 0.3264  |
| VLDL, mg/dL                    | VLDL, mg/dL                            | 26 | 0.14 | 0.22  | 0.16 | 1.33  | 0.1976  |
|                                | Length of Fast,<br>days <sup>λ</sup>   |    |      | 0.52  | 0.32 | 1.61  | 0.1212  |
| VLDL, mg/dL                    | VLDL, mg/dL                            | 26 | 0.09 | 0.20  | 0.17 | 1.22  | 0.2363  |
|                                | Length of<br>Refeed, days <sup>λ</sup> |    |      | 0.40  | 0.41 | 0.97  | 0.3406  |
| VLDL, mg/dL                    | VLDL, mg/dL                            | 26 | 0.15 | 0.22  | 0.16 | 1.37  | 0.1831  |
|                                | Length of Total,<br>days <sup>λ</sup>  |    |      | 0.35  | 0.21 | 1.63  | 0.1173  |
| Glucose, nmol/L                | Glucose, nmol/L                        | 26 | 0.53 | 1.19  | 0.23 | 5.08  | <0.0001 |
|                                | Length of Fast,<br>days                |    |      | 0.02  | 0.03 | 0.60  | 0.556   |
| Glucose, nmol/L                | Glucose, nmol/L                        | 25 | 0.56 | 1.18  | 0.23 | 5.18  | <0.0001 |
|                                | Length of<br>Refeed, days              |    |      | -0.04 | 0.03 | -1.22 | 0.234   |
| Glucose, nmol/L                | Glucose, nmol/L                        | 26 | 0.53 | 1.19  | 0.24 | 5.06  | <0.0001 |
|                                | Length of Total,<br>day                |    |      | 0.00  | 0.02 | -0.25 | 0.808   |
| Insulin                        | Insulin                                | 25 | 0.56 | 1.39  | 0.26 | 5.26  | <0.0001 |

|                      |                                        |    |      |      |      |       |         |
|----------------------|----------------------------------------|----|------|------|------|-------|---------|
|                      | Length of Fast, days                   |    |      | 0.01 | 0.25 | 0.04  | 0.965   |
| Insulin              | Insulin                                | 26 | 0.56 | 1.38 | 0.28 | 4.89  | <0.0001 |
|                      | Length of Refeed, days                 |    |      | 0.04 | 0.28 | 0.15  | 0.88    |
| Insulin              | Insulin                                | 25 | 0.56 | 1.39 | 0.27 | 5.20  | <0.0001 |
|                      | Length of Total, days                  |    |      | 0.02 | 0.16 | 0.12  | 0.909   |
| HOMA-IR              | HOMA-IR                                | 26 | 0.61 | 0.83 | 0.15 | 5.65  | <0.0001 |
|                      | Length of Fast, days                   |    |      | 0.02 | 0.02 | 1.39  | 0.179   |
| HOMA-IR              | HOMA-IR                                | 26 | 0.57 | 0.85 | 0.16 | 5.32  | <0.0001 |
|                      | Length of Refeeding, days <sup>λ</sup> |    |      | 0.00 | 0.02 | -0.08 | 0.939   |
| HOMA-IR              | HOMA-IR                                | 26 | 0.59 | 0.82 | 0.15 | 5.31  | <0.0001 |
|                      | Length of Total, days                  |    |      | 0.01 | 0.01 | 0.88  | 0.3864  |
| HOMA-IR <sup>α</sup> | HOMA-IR                                | 26 | 0.61 | 0.83 | 0.15 | 5.65  | <0.0001 |
|                      | Length of Refeeding, days              |    |      | 0.02 | 0.02 | 1.39  | 0.179   |
| HOMA-IR <sup>α</sup> | HOMA-IR                                | 26 | 0.57 | 0.85 | 0.16 | 5.32  | <0.0001 |
|                      | Length of Refeeding, days              |    |      | 0.00 | 0.02 | -0.08 | 0.939   |
| HOMA-IR <sup>α</sup> | HOMA-IR                                | 26 | 0.59 | 0.82 | 0.15 | 5.31  | <0.0001 |
|                      | Length of Total, days                  |    |      | 0.01 | 0.01 | 0.88  | 0.3864  |

*N* = 26. ‡ = 25 observations (i.e., *N* = 25). Dependent variable measured at EOR. ζ = Direction of a statistically significant coefficient diverges from a statistically significant coefficient from the main model of interest. λ = Statistical significance of p-value diverges from the main model of interest.

**Table S6.** Baseline adjusted regression (with outliers), a sensitivity analysis for Siegel repeated medians

| Model                       |                                     | R <sup>2</sup> | Coefficients |      | t value | Pr(> t ) |
|-----------------------------|-------------------------------------|----------------|--------------|------|---------|----------|
| Change Score                | Baseline                            |                | β            | S.E. |         |          |
| Abdominal Circumference, cm | Abdominal Circumference, cm         | 0.92           | 0.92         | 0.06 | 16.16   | <0.0001  |
|                             | Length of Fast, days                |                | -0.44        | 0.12 | -3.61   | 0.0015   |
| Abdominal Circumference, cm | Abdominal Circumference, cm         | 0.88           | 0.94         | 0.07 | 13.05   | <0.0001  |
|                             | Length of Refeed, days <sup>λ</sup> |                | -0.25        | 0.19 | -1.31   | 0.204    |
| Abdominal Circumference, cm | Abdominal Circumference, cm         | 0.91           | 0.95         | 0.06 | 15.56   | <0.0001  |
|                             | Length of Total, days               |                | -0.27        | 0.09 | -3.14   | 0.0046   |
| hsCRP, mg/L                 | hsCRP, mg/L                         | 0.44           | 0.30         | 0.07 | 4.11    | 0.0004   |



|                    |                                        |      |       |      |       |         |
|--------------------|----------------------------------------|------|-------|------|-------|---------|
|                    | Length of Fast, days <sup>λ</sup>      |      | -0.04 | 0.06 | -0.59 | 0.564   |
| hsCRP, mg/L        | hsCRP, mg/L                            | 0.43 | 0.29  | 0.07 | 4.18  | 0.0004  |
|                    | Length of Refeeding, days <sup>λ</sup> |      | -0.04 | 0.07 | -0.52 | 0.6094  |
| hsCRP, mg/L        | hsCRP, mg/L                            | 0.44 | 0.30  | 0.07 | 4.16  | 0.0004  |
|                    | Length of Total, days <sup>λ</sup>     |      | -0.03 | 0.04 | -0.69 | 0.4997  |
| Weight, kg         | Weight, kg                             | 0.98 | 0.97  | 0.03 | 29.49 | <0.0001 |
|                    | Length of Refeed, days                 |      | -0.37 | 0.13 | -2.79 | 0.0105  |
| Weight, kg         | Weight, kg                             | 0.98 | 0.95  | 0.03 | 35.19 | <0.0001 |
|                    | Length of Refeed, days                 |      | -0.26 | 0.06 | -4.47 | 0.0002  |
| BMI, kg/m2         | BMI, kg/m2                             | 0.98 | 0.92  | 0.03 | 31.88 | <0.0001 |
|                    | Length of Fast, days                   |      | -0.14 | 0.03 | -4.75 | <0.0001 |
| BMI, kg/m2         | BMI, kg/m2                             | 0.97 | 0.96  | 0.04 | 25.12 | <0.0001 |
|                    | Length of Refeed, days                 |      | -0.13 | 0.05 | -2.71 | 0.0126  |
| BMI, kg/m2         | BMI, kg/m2                             | 0.98 | 0.95  | 0.03 | 33.62 | <0.0001 |
|                    | Length of Total, days                  |      | -0.10 | 0.02 | -5.20 | <0.0001 |
| Diastolic BP, mmHg | Diastolic BP, mmHg                     | 0.07 | 0.23  | 0.19 | 1.19  | 0.2476  |
|                    | Length of Fast, days <sup>λ</sup>      |      | -0.03 | 0.32 | -0.10 | 0.918   |
| Insulin            | Insulin                                | 0.55 | 1.73  | 0.37 | 4.70  | <0.0001 |
|                    | Length of Fast, days <sup>λ</sup>      |      | 0.67  | 0.3  | 2.20  | 0.0386  |
| Insulin            | Insulin                                | 0.46 | 1.67  | 0.44 | 3.84  | 0.0008  |
|                    | Length of Refeed, days                 |      | 0.27  | 0.44 | 0.61  | 0.5455  |
| Insulin            | Insulin                                | 0.52 | 1.60  | 0.39 | 4.10  | 0.0004  |
|                    | Length of Total, days                  |      | 0.39  | 0.22 | 1.80  | 0.0849  |

N = 26. Dependent variable measured at EOR. <sup>λ</sup> = Statistical significance of p-value diverges from the main model of interest.

**Table S7.** Linear regression (with outliers), a sensitivity analysis for linear regression (no outliers)

| Model         |                      | R <sup>2</sup> | Coefficients |      | t value | Pr(> t ) |
|---------------|----------------------|----------------|--------------|------|---------|----------|
| End of Refeed | Baseline             |                | β            | S.E. |         |          |
| ln HOMA-IR    | ln HOMA-IR           | 0.57           | 0.85         | 0.15 | 5.69    | <0.0001  |
| ln HOMA-IR    | Length of Fast, days | 0.06           | 0.03         | 0.02 | 1.26    | 0.2210   |

|            |                              |      |      |      |      |        |
|------------|------------------------------|------|------|------|------|--------|
| ln HOMA-IR | Length of Refeeding,<br>days | 0.05 | 0.03 | 0.03 | 1.13 | 0.2685 |
|------------|------------------------------|------|------|------|------|--------|

---

*N* = 26. Results include outlier ID 24.
